# Supplementary material
Source: HighWire-hosted journal article supplement (https://bmjopen.bmj.com/content/7/8/e016140)
Supplement: inline-supplementary-material-1 [file inline-supplementary-material-1.pdf]

# Supplementary Information

**Supplementary table S1.** Score assigned if parent meets criterion for risk factor on the IPARAN.

| <b>General risk factors</b>                                                             | <b>Score</b>                         |                                |
|-----------------------------------------------------------------------------------------|--------------------------------------|--------------------------------|
| Birth weight, (<2500 grams)                                                             | 1.0                                  |                                |
| Duration of pregnancy, (<38 weeks)                                                      | 0.5                                  |                                |
| Family composition, (single parent,)                                                    | 2.0                                  |                                |
| Age mother, (<19 years)                                                                 | 0.5 (18 years) or<br>1.0 (<18 years) |                                |
| Age father, (<19 years)                                                                 | 0.5 (18 years) or<br>1.0 (<18 years) |                                |
|                                                                                         |                                      |                                |
| <b>Father and mother part</b>                                                           | <b>Score of the<br/>Father</b>       | <b>Score of the<br/>Mother</b> |
| Worried about raising your child ( <i>always-often</i> )                                | 1.0                                  | 2.0                            |
| Unhappy during pregnancy about becoming a mother/father ( <i>always-often</i> )         | 1.0                                  | 1.0                            |
| Parents (or carers) had loving relationship ( <i>sometimes-never</i> )                  | 1.0                                  | 1.0                            |
| Felt safe with parents (or carers) as a child ( <i>sometimes-never</i> )                | 1.0                                  | 1.0                            |
| Being hit as a child ( <i>always-often-sometimes</i> )                                  | 1.0                                  | 1.0                            |
| Hitting should be part of upbringing ( <i>yes</i> )                                     | 1.0                                  | 1.5                            |
| Should use less alcohol or drugs ( <i>yes</i> )                                         | 0.5                                  | 0.5                            |
| Ever had a negative sexual experience ( <i>yes</i> )                                    | 1.0                                  | 1.5                            |
| Ever felt unhappy in past 3 years ( <i>always-often</i> )                               | 1.0                                  | 2.0                            |
| Losing temper ( <i>always-often</i> )                                                   | 1.0                                  | 1.0                            |
| Finding it difficult to ask for help ( <i>always-often</i> )                            | -                                    | 1.0                            |
| Quarrels with partner ever become physical ( <i>always-often-sometimes</i> )            | 2.0                                  | 1.0                            |
| Feeling comfortable in neighborhood ( <i>sometimes-never</i> )                          | -                                    | 0.5                            |
| Maintain close relations with family ( <i>sometimes-never</i> )                         | -                                    | 0.5                            |
| Receiving support from network of family, neighbors, friends ( <i>sometimes-never</i> ) | -                                    | 0.5                            |
| Receiving support from partner ( <i>sometimes-never</i> )                               | 0.5                                  | 1.5                            |
